# Supplementary material for: Impact of phenytoin and valproic acid on cytotoxicity and inflammatory mediators in human mononuclear cells: with and without lipopolysaccharide stimulation
Source: PeerJ. 2025 Mar 17;13:e19102. doi: 10.7717/peerj.19102 (PMC11925041; doi:10.7717/peerj.19102)
Supplement: Supplemental Information 1 [file peerj-13-19102-s001.xlsx]

## Sheet: Raw data 
R		Key
				Control	Phenytoin	A-con1	A-con2	A-con3	A-con4					Cont	Phenytoin	VAL-con1	VAL-con2	VAL-con3	VAL-con4
			Donor 1	Samples D1	Samples D1	Samples D1	Samples D1	Samples D1	Samples D1			cell count D1	D1	267.9	202.35	236.55	237.5	209	182.4
			Donor 1-	Samples D1	Samples D1	Samples D1	Samples D1	Samples D1	Samples D1				D1-	296.1	223.65	261.45	262.5	231	201.6
			Donor 2	Samples D2	Samples D2	Samples D2	Samples D2	Samples D2	Samples D2				D2	262.2	202.35	233.7	238.45	196.65	174.8
			Donor 2-	Samples D2	Samples D2	Samples D2	Samples D2	Samples D2	Samples D2				D2-	289.8	223.65	258.3	263.55	217.35	193.2
			Donor3	Samples D3	Samples D3	Samples D3	Samples D3	Samples D3	Samples D3				D3	265.05	216.6	231.8	240.35	205.2	185.25
			Donor3-	Samples D3	Samples D3	Samples D3	Samples D3	Samples D3	Samples D3				D3-	292.95	239.4	256.2	265.65	226.8	204.75
			Donor4	Samples D4	Samples D4	Samples D4	Samples D4	Samples D4	Samples D4				D4	256.5	212.8	233.7	233.7	194.75	179.55
			Donor4-	Samples D4	Samples D4	Samples D4	Samples D4	Samples D4	Samples D4				D4-	283.5	235.2	258.3	258.3	215.25	198.45
				cont + LPS	phyno + LPS	A-con1 + LPS	A-con2 + LPS	A-con3 + LPS	A-Con4 +LPS					cont + LPS	phyno + LPS	VAL-con1 + LPS	VAL-con2 + LPS	VAL-con3 + LPS	VAL-Con4 +LPS
			Donor 1-+LPS	Samples D1	Samples D1	Samples D1	Samples D1	Samples D1	Samples D1				D1	155.8	178.6	190	158.65	153.9	117.8
			Donor 1+LPS	Samples D1	Samples D1	Samples D1	Samples D1	Samples D1	Samples D1				D1-	172.2	197.4	210	175.35	170.1	130.2
			Donor 2+LPS	Samples D2	Samples D2	Samples D2	Samples D2	Samples D2	Samples D2				D2	148.2	171	196.65	145.35	159.6	114
			Donor 2-+LPS	Samples D2	Samples D2	Samples D2	Samples D2	Samples D2	Samples D2				D2-	163.8	189	217.35	160.65	176.4	126
			Donor3+LPS	Samples D3	Samples D3	Samples D3	Samples D3	Samples D3	Samples D3				D3	137.75	164.35	208.05	171	184.3	126.35
			Donor3-+LPS	Samples D3	Samples D3	Samples D3	Samples D3	Samples D3	Samples D3				D3-	152.25	181.65	229.95	189	203.7	139.65
			Donor4+LPS	Samples D4	Samples D4	Samples D4	Samples D4	Samples D4	Samples D4				D4	125.4	185.25	206.15	176.7	150.1	133.95
			Donor4-+LPS	Samples D4	Samples D4	Samples D4	Samples D4	Samples D4	Samples D4				D4-	138.6	204.75	227.85	195.3	165.9	148.05
			Cont	Phenytoin	A-con1	A-con2	A-con3	A-con4						Cont	Phenytoin	VAL-con1	VAL-con2	VAL-con3	VAL-con4
	IL-1β Concentrations (pg/ml)	D1	9.754	14.105	37.036	3.84	16.236	18.207				cell count D3	D1	190	142.5	180.5	161.5	142.5	114
		D1-	10	14.305	37.236	3.38	17.946	20.123					D1-	210	157.5	199.5	178.5	157.5	126
		D2	4.559	6.056	13.25	3.59	8.43	2.904					D2	209.95	172.9	206.15	197.6	195.7	173.85
		D2-	4.759	6.256	13.45	3.958	9.316	3.21					D2-	232.05	191.1	227.85	218.4	216.3	192.15
		D3	22.481	30.116	45.405	6.905	12.11	6.768					D3	204.25	170.05	196.65	193.8	186.2	176.7
		D3-	22.681	30.316	45.605	7.632	13.384	7.48					D3-	225.75	187.95	217.35	214.2	205.8	195.3
		D4	17.942	89.294	150.835	3.788	8.642	5.201					D4	99.75	124.45	178.6	160.55	140.6	113.05
		D4-	18.142	89.494	151.035	4.186	9.552	5.749					D4-	110.25	137.55	197.4	177.45	155.4	124.95
			cont + LPS	phyno + LPS	A-con1 + LPS	A-con2 + LPS	A-con3 + LPS	A-Con4 +LPS						cont + LPS	phyno + LPS	VAL-con1 + LPS	VAL-con2 + LPS	VAL-con3 + LPS	VAL-Con4 +LPS
		D1	58.36	28.987	32.135	165.445	43.56	111.521					D1	60.8	90.25	125.4	108.3	112.1	101.65
		D1-	58.56	29.187	32.335	182.859	48.146	123.259					D1-	67.2	99.75	138.6	119.7	123.9	112.35
		D2	35.292	38.63	26.085	32.946	23.849	65.911					D2	97.85	79.8	121.6	135.85	133.95	86.45
		D2-	35.492	38.83	26.285	36.414	26.359	72.849					D2-	108.15	88.2	134.4	150.15	148.05	95.55
		D3	26.406	41.514	271.726	264.213	78.806	391.875					D3	131.1	117.8	128.25	121.6	127.3	127.3
		D3-	26.606	41.714	271.926	292.025	87.102	433.125					D3-	144.9	130.2	141.75	134.4	140.7	140.7
		D4	25.307	87.375	55.452	20.842	290.685	80.481					D4	61.75	77.9	114	95	105.45	85.5
		D4-	25.507	87.575	55.652	23.036	321.283	88.953					D4-	68.25	86.1	126	105	116.55	94.5
														Cont	Phenytoin	VAL-con1	VAL-con2	VAL-con3	VAL-con4
			Cont	Phenytoin	A-con1	A-con2	A-con3	A-con4				Live cell count D1	D1	190	160.55	190	189.05	146.3	118.75
	IL-6 Concentrations (pg/ml)	D1	35.91	131.348	5.051	2.645	2.779	7.162					D1-	210	177.45	210	208.95	161.7	131.25
		D1-	39.69	145.174	5.583	2.923	3.071	7.916					D2	190	153.9	187.15	175.75	155.8	90.25
		D2	43.151	201.26	2.275	3.241	2.512	16					D2-	210	170.1	206.85	194.25	172.2	99.75
		D2-	47.693	222.446	2.515	3.583	2.776	17.684					D3	199.5	171	189.05	201.4	156.75	122.55
		D3	100.039	284.147	4.171	3.658	7.356	20.433					D3-	220.5	189	208.95	222.6	173.25	135.45
		D3-	110.569	314.057	4.611	4.044	8.13	22.585					D4	190	170.05	192.85	177.65	156.75	111.15
		D4	84.305	421.135	3.076	5.748	5.503	27.746					D4-	210	187.95	213.15	196.35	173.25	122.85
		D4-	93.179	465.465	3.4	6.352	6.083	30.666						cont + LPS	phyno + LPS	VAL-con1 + LPS	VAL-con2 + LPS	VAL-con3 + LPS	VAL-Con4 +LPS
			cont + LPS	phyno + LPS	A-con1 + LPS	A-con2 + LPS	A-con3 + LPS	A-Con4 +LPS					D1	190	137.75	161.5	115.9	130.15	83.6
		D1	5.564	21.645	1.789	1.967	1.764	1.891					D1-	210	152.25	178.5	128.1	143.85	92.4
		D1-	6.15	23.923	1.977	2.173	1.95	2.089					D2	171	137.75	160.55	108.3	139.65	76
		D2	3.631	3.241	1.915	1.865	1.839	2.25					D2-	189	152.25	177.45	119.7	154.35	84
		D2-	4.013	3.583	2.117	2.061	2.033	2.486					D3	114	132.05	173.85	133	135.85	70.3
		D3	6.337	3.658	2.328	1.865	2.485	2.095					D3-	126	145.95	192.15	147	150.15	77.7
		D3-	7.003	4.044	2.572	2.061	2.747	2.315					D4	171	139.65	178.6	119.7	125.4	84.55
		D4	1.714	5.748	1.839	2.538	2.25	2.671					D4-	189	154.35	197.4	132.3	138.6	93.45
		D4-	1.894	6.352	2.033	2.806	2.486	2.953
														Cont	Phenytoin	VAL-con1	VAL-con2	VAL-con3	VAL-con4
												Live cell count D3	D1	133	104.5	133	104.5	84.55	57
													D1-	147	115.5	147	115.5	93.45	63
													D2	144.4	105.45	141.55	103.55	94.05	80.75
													D2-	159.6	116.55	156.45	114.45	103.95	89.25
													D3	138.7	99.75	127.3	117.8	95	80.75
			Cont	Phenytoin	A-con1	A-con2	A-con3	A-con4					D3-	153.3	110.25	140.7	130.2	105	89.25
	IL-18 Concentrations (pg/ml)	D1	157.571	188.64	161.296	74.452	118.039	159.901					D4	95	67.45	106.4	92.15	56.05	46.55
		D1-	174.157	208.496	178.274	82.288	130.463	176.733					D4-	105	74.55	117.6	101.85	61.95	51.45
		D2	90.765	106.921	81.071	31.306	43.146	69.396						cont + LPS	phyno + LPS	VAL-con1 + LPS	VAL-con2 + LPS	VAL-con3 + LPS	VAL-Con4 +LPS
		D2-	100.319	118.175	89.603	34.602	47.688	76.7					D1	76	25.65	85.5	73.15	71.25	51.3
		D3	167.767	179.635	183.249	59.593	64.827	84.331					D1-	84	28.35	94.5	80.85	78.75	56.7
		D3-	185.427	198.543	202.539	65.865	71.649	93.207					D2	76	28.5	80.75	84.55	86.45	46.55
		D4	205.484	169.147	194.036	17.453	80.523	97.616					D2-	84	31.5	89.25	93.45	95.55	51.45
		D4-	227.114	186.951	214.376	19.289	89	107.892					D3	80.75	45.6	72.2	63.65	64.6	38.95
			cont + LPS	phyno + LPS	A-con1 + LPS	A-con2 + LPS	A-con3 + LPS	A-Con4 +LPS					D3-	89.25	50.4	79.8	70.35	71.4	43.05
		D1	200.2	183.7	143.889	196.66	209.426	222.445					D4	75.05	38	66.5	65.55	66.5	50.35
		D1-	221.274	203.036	159.035	217.362	231.47	245.861					D4-	82.95	42	73.5	72.45	73.5	55.65
		D2	103.326	92.357	112.006	118.039	126.955	119.037
		D2-	114.202	102.079	123.796	130.463	140.319	131.567
		D3	115.032	89.701	120.033	124.987	183.249	172.811
		D3-	127.14	99.143	132.669	138.143	202.539	191.001
		D4	111.5	100.221	113.017	142.456	161.296	178.728						Cont	Phenytoin	VAL-con1	VAL-con2	VAL-con3	VAL-con4
		D4-	123.238	110.771	124.913	157.452	178.274	197.542				Dead cell count D1	D1	13.3	41.8	28.5	48.45	44.65	63.65
													D1-	14.7	46.2	31.5	53.55	49.35	70.35
													D2	52.25	38.95	46.55	45.6	40.85	73.15
													D2-	57.75	43.05	51.45	50.4	45.15	80.85
			Cont	Phenytoin	A-con1	A-con2	A-con3	A-con4					D3	52.25	45.6	42.75	38.95	44.65	62.7
	IgA Concentrations (pg/ml)	D1	0.04	0.233	0.076	0.116	0.293	0.823					D3-	57.75	50.4	47.25	43.05	49.35	69.3
		D1-	0.044	0.257	0.084	0.128	0.323	0.909					D4	38	42.75	40.85	56.05	38	58.9
		D2	1.425	1.864	1.313	0.305	0.983	1.2					D4-	42	47.25	45.15	61.95	42	65.1
		D2-	1.575	2.06	1.451	0.337	1.087	1.326						cont + LPS	phyno + LPS	VAL-con1 + LPS	VAL-con2 + LPS	VAL-con3 + LPS	VAL-Con4 +LPS
		D3	1.685	1.955	1.598	0.705	1.262	1.822					D1	65.55	40.85	28.5	41.8	41.8	66.5
		D3-	1.863	2.161	1.766	0.779	1.394	2.014					D1-	72.45	45.15	31.5	46.2	46.2	73.5
		D4	0.285	1.07	0.649	0.25	0.252	0.408					D2	38	38	38	42.75	38.95	66.5
		D4-	0.315	1.182	0.717	0.276	0.278	0.45					D2-	42	42	42	47.25	43.05	73.5
			cont + LPS	phyno + LPS	A-con1 + LPS	A-con2 + LPS	A-con3 + LPS	A-Con4 +LPS					D3	29.45	41.8	38	42.75	48.45	66.5
		D1	0.382	0.446	0.122	0.141	0.155	0.34					D3-	32.55	46.2	42	47.25	53.55	73.5
		D1-	0.422	0.492	0.134	0.155	0.171	0.376					D4	29.45	47.5	47.5	57	38	63.65
		D2	1.845	2.037	1.27	1.52	1.939	1.8					D4-	32.55	52.5	52.5	63	42	70.35
		D2-	2.039	2.251	1.404	1.68	2.143	1.99
		D3	2.255	2.41	0.809	1.434	2.154	2.116
		D3-	2.493	2.664	0.895	1.584	2.38	2.338
		D4	0.429	1.377	0.2	0.321	0.488	0.855						Cont	Phenytoin	VAL-con1	VAL-con2	VAL-con3	VAL-con4
		D4-	0.475	1.521	0.22	0.355	0.54	0.945				Dead cell count D3	D1	57	68.4	68.4	52.25	72.2	92.15
													D1-	63	75.6	75.6	57.75	79.8	101.85
													D2	65.55	67.45	67.45	47.5	73.15	93.1
													D2-	72.45	74.55	74.55	52.5	80.85	102.9
													D3	65.55	70.3	50.35	73.15	43.7	73.15
													D3-	72.45	77.7	55.65	80.85	48.3	80.85
													D4	44.65	56.05	72.2	68.4	66.5	65.55
													D4-	49.35	61.95	79.8	75.6	73.5	72.45
														cont + LPS	phyno + LPS	VAL-con1 + LPS	VAL-con2 + LPS	VAL-con3 + LPS	VAL-Con4 +LPS
													D1	65.55	63.65	57	42.75	71.25	95
													D1-	72.45	70.35	63	47.25	78.75	105
													D2	57	71.25	69.35	94.05	61.75	52.25
													D2-	63	78.75	76.65	103.95	68.25	57.75
													D3	58.9	72.2	64.6	57.95	74.1	88.35
													D3-	65.1	79.8	71.4	64.05	81.9	97.65
													D4	61.75	62.7	63.65	58.9	73.15	85.5
													D4-	68.25	69.3	70.35	65.1	80.85	94.5
														Cont	Phenytoin	VAL-con1	VAL-con2	VAL-con3	VAL-con4
												viability % D1	D1	89.18	67.48	78.92	79.26	69.61	60.8
													D1-	98.56	74.58	87.22	87.6	76.93	67.2
													D2	87.47	67.52	77.99	79.58	65.46	58.21
													D2-	96.67	74.62	86.21	87.96	72.34	64.33
													D3	88.35	72.17	77.24	79.99	68.31	61.85
													D3-	97.65	79.77	85.36	88.41	75.49	68.35
													D4	85.57	70.99	78.02	77.93	64.79	59.85
													D4-	94.57	78.47	86.24	86.13	71.61	66.15
														cont + LPS	phyno + LPS	VAL-con1 + LPS	VAL-con2 + LPS	VAL-con3 + LPS	VAL-Con4 +LPS
													D1	57	59.57	63.3	52.79	51.27	39.24
													D1-	63	65.83	69.96	58.35	56.67	43.36
													D2	52.25	57	65.48	48.57	53.32	37.93
													D2-	57.75	63	72.38	53.69	58.94	41.93
													D3	57	54.84	69.23	57	61.49	42.15
													D3-	63	60.62	76.51	63	67.97	46.59
													D4	57	61.87	68.78	59	49.9	44.65
													D4-	63	68.39	76.02	65.2	55.16	49.35
														Cont	Phenytoin	VAL-con1	VAL-con2	VAL-con3	VAL-con4
												Viability % D3	D1	66.51	58.05	66.61	64.61	62.42	57
													D1-	73.51	64.17	73.63	71.41	69.08	63
													D2	70.02	57.92	68.78	65.86	65.24	57.95
													D2-	77.38	64.02	76.02	72.8	72.1	64.05
													D3	68.31	56.69	65.65	64.72	62.2	58.9
													D3-	75.49	62.65	72.55	71.54	68.74	65.1
													D4	33.37	41.52	59.63	53.77	46.96	37.84
													D4-	36.89	45.88	65.91	59.43	51.9	41.82
														cont + LPS	phyno + LPS	VAL-con1 + LPS	VAL-con2 + LPS	VAL-con3 + LPS	VAL-Con4 +LPS
													D1	20.26	30.21	41.87	36.17	37.4	34.17
													D1-	22.4	33.39	46.27	39.97	41.34	37.77
													D2	32.9	26.6	40.57	45.32	44.84	29.07
													D2-	36.36	29.4	44.83	50.08	49.56	32.13
													D3	43.86	39.3	42.75	40.73	42.44	42.47
													D3-	48.48	43.44	47.25	45.01	46.9	46.93
													D4	42.86	38	40.85	37.05	38	41.94
													D4-	47.38	42	45.15	40.95	42	46.36
